1

2

3

4

5

6

7

8

# **Estimation of Laminar BOLD Activation Profiles using Deconvolution with a Physiological Point Spread Function**

9

10

11

Irati Markuerkiaga<sup>1</sup>, José P. Marques<sup>1</sup>, Tara E. Gallagher<sup>2</sup>, David G. Norris<sup>1,3</sup>

12

<sup>1</sup> *Donders Centre for Cognitive Neuroimaging, Radboud University, Nijmegen, The Netherlands*

13

<sup>2</sup> *Department of Physics and Astronomy, Dartmouth College, Hanover, NH, USA*

14

<sup>3</sup> *Erwin L. Hahn Institute for Magnetic Resonance Imaging, 45141 Essen, Germany*

15

16

17 **Abstract**

18 *-Background*

19 The specificity of gradient echo (GE)-BOLD laminar fMRI activation profiles is degraded by intracortical  
20 veins that drain blood from lower to upper cortical layers, propagating activation signal in the same  
21 direction. This work describes an approach to obtain layer specific profiles by deconvolving the measured  
22 profiles with a physiological Point Spread Function (PSF).

23 *-New Method*

24 It is shown that the PSF can be characterised by a TE-dependent peak to tail (p2t) value that is  
25 independent of cortical depth and can be estimated by simulation. An experimental estimation of  
26 individual p2t values and the sensitivity of the deconvolved profiles to variations in p2t is obtained using  
27 laminar data measured with a multi-echo 3D-FLASH sequence. These profiles are echo time dependent,  
28 but the underlying neuronal response is the same, allowing a data-based estimation of the PSF.

29 *-Results*

30 The deconvolved profiles are highly similar to the gold-standard obtained from extremely high resolution  
31 3D-EPI data, for a range of p2t values of 5-9, which covers both the empirically determined value (7.1)  
32 and the value obtained by simulation (6.3).

33 *-Comparison with Existing Method(s)*

34 Corrected profiles show a flatter shape across the cortex and a high level of similarity with the gold-  
35 standard, defined as a subset of profiles that are unaffected by intracortical veins.

36 *-Conclusions*

37 We conclude that deconvolution is a robust approach for removing the effect of signal propagation  
38 through intracortical veins. This makes it possible to obtain profiles with high laminar specificity while  
39 benefitting from the higher sensitivity and efficiency of GE-BOLD sequences.

40 **Keywords**

41 BOLD fMRI, layer specific fMRI, fMRI with high spatial specificity

## 42 **INTRODUCTION**

43 Within the iso-cortex the type and density of brain cells varies following a laminar pattern. Following the  
44 canonical model (Felleman and Van Essen, 1991) there are distinctive patterns of laminar connectivity,  
45 corresponding to feedforward, feedback, and lateral interactions. Therefore, detecting neuronal activity at  
46 the laminar level is of interest to understand the hierarchical relationship between different brain regions  
47 and better understand brain function.

48 Although some initial attempts have been made using magnetoencephalography (Bonaiuto et al., 2018;  
49 Troebinger et al., 2014), functional MRI (fMRI) is to date the most popular non-invasive *in-vivo* technique  
50 to measure brain function at sub-millimetre resolution and obtain cortical depth-resolved activation signals  
51 (Koopmans and Yacoub, 2019; Norris and Polimeni, 2019).

52 The most widely used method in fMRI measures the Gradient Echo (GE) based blood oxygenation level  
53 dependent (BOLD) signal. The advantage of this method is that it has a higher sensitivity to activation and  
54 a higher efficiency compared to the other MR methods available for fMRI. The disadvantage is its reduced  
55 spatial specificity due to the contribution from large veins (Boxerman et al., 1995). In layer-specific fMRI the  
56 spatial specificity of the measured BOLD profile is degraded by the contribution from emerging or  
57 intracortical veins. These are the veins that are oriented perpendicular to the pial surface and drain blood  
58 uni-directionally from lower to upper layers. Therefore, part of the activation signal in a lower layer will  
59 propagate or leak into upper layers downstream. This phenomenon will be referred to as the “inter-laminar  
60 leakage-problem” in this manuscript.

61 There are a number of MR methods that suffer less from large vein contamination. These were originally  
62 developed for use in standard-resolution fMRI, but have been applied in laminar fMRI studies too. One of  
63 these methods consists of combining the standard GE-BOLD method with a differential paradigm (Cheng  
64 et al., 2001; Kashyap et al., 2018; Menon et al., 1997; Polimeni et al., 2010a; Sanchez Panchuelo et al.,  
65 2015). The signal resulting from the subtraction of the condition of interest and the control condition is  
66 expected to have a much lower contribution from large veins. SE-based sequences represent another way  
67 of obtaining an activation signal with little contribution from large veins (Goense and Logothetis, 2006; Harel  
68 et al., 2006; Harmer et al., 2012; Kemper et al., 2015; Yacoub et al., 2007; Yacoub et al., 2009; Zhao et al.,  
69 2006). The 180° pulse refocuses the extravascular signal in the static dephasing regime, which is the source  
70 of the largest contribution in GE-BOLD at 3T and above (Cheng et al., 2015). The S2 signal of the  
71 unbalanced SSFP sequence is believed to be dominated by T2 contrast, therefore the BOLD signal is  
72 expected to have only a small contribution from larger veins at high-fields (Barth et al., 2010; Ehses et al.,  
73 2013; Goa et al., 2014). An important method for obtaining an activation signal without venous contribution,  
74 that can be applied in laminar studies, is the measurement of cerebral blood volume (CBV) changes using  
75 the vascular space occupancy (VASO) method (Finn et al., 2019; Guidi et al., 2016; Huber et al., 2015;  
76 Huber et al., 2017; Lu et al., 2003). The activation signal measured with this method is proportional to the

77 change in vascular blood volume. As the largest portion of blood volume change is located in the arterioles  
78 and capillary bed, (Krieger et al., 2012) this technique is not weighted towards larger post-capillary vessels.

79 The alternative methods to GE-BOLD mentioned above present different specific technical difficulties of  
80 their own (for example: sensitivity to motion, risk of exceeding energy deposition limits at high static  
81 magnetic field strengths, inefficient tagging or inversion of the blood signal). Nonetheless, they all have in  
82 common a lower sensitivity to activation and temporal resolution compared to the standard GE-BOLD based  
83 fMRI approach.

84 This manuscript examines a method to deal with the inter-laminar leakage problem in the steady state. It  
85 consists of deconvolving the measured GE-BOLD activation profile averaged across the cortex with the  
86 spatial physiological point spread function (PSF) of the BOLD response to laminar activation. This  
87 physiological PSF characterises the BOLD signal leakage from the layer of activation to layers downstream.  
88 As it is not generally possible to measure the PSF *in vivo*, the PSF estimated in Markuerkiaga et al. (2016)  
89 using a model of cortical vasculature is used. The strength of this method is that it is expected to deliver  
90 BOLD activation profiles with little inter-laminar leakage while allowing the use of data acquired with the  
91 simplest fMRI sequence that has the highest efficiency and sensitivity. The method presented in this  
92 manuscript and the spatial GLM approach (Kok et al., 2016; Polimeni et al., 2010b; van Mourik et al., 2019)  
93 do not address the same problem. The deconvolution approach aims at removing the effect of draining  
94 veins from the functional profiles whereas spatial GLM is a purely geometric approach that aims to reduce  
95 partial volume effects, and is not necessarily related to functional acquisitions.

96 The deconvolution approach has previously been proposed (Markuerkiaga and Norris, 2016) and  
97 subsequently adopted by other users (Marquardt et al., 2018). It is attractive because although  
98 deconvolution can be an unstable process, here it is equivalent to a subtraction of responses in lower layers  
99 from the responses in higher layers, which is mathematically more robust. By use of a more sophisticated  
100 modelling approach it can also be extended to the dynamic situation (Havlicek and Uludag, 2020). In the  
101 current contribution the validity of the deconvolution approach is assessed on previously published profiles  
102 acquired at 7T. First the approach is validated on the profiles obtained using an ultrahigh resolution 3D-EPI  
103 acquisition approach (Fracasso et al., 2018). The profiles obtained in this study were grouped into strong,  
104 middle and weak linear trends, whereby the latter were assumed to have a very small contribution from  
105 intracortical veins. These latter profiles are considered as the gold-standard of leakage-free activation  
106 profiles in this manuscript. Successful deconvolution of the full profile should hence yield a profile similar to  
107 those with little contribution from intracortical veins. We then deconvolve the profiles at different TEs  
108 obtained using a multi-echo 3D-FLASH sequence (Koopmans et al., 2011). In this dataset, BOLD profiles  
109 are echo dependent, mostly due to the strong TE-dependency of the intravascular venous contribution, but  
110 the underlying neuronal state is not. This feature is exploited to perform a data-based estimation of the PSF.  
111 Lastly, the sensitivity of the deconvolution results to the choice of parameters used for the PSF is studied.  
112

## 113 **MATERIALS AND METHODS**

### 114 **Mathematical description of the inter-laminar leakage**

115 In the steady state, the measured activation profile can be understood as the weighted sum of the laminar  
 116 BOLD responses convolved with the corresponding layer specific physiological point spread function (PSF).  
 117 This can be expressed as  $Y = X\beta + \epsilon$ , where  $X$  is a matrix of layer specific PSFs,  $\beta$  is the underlying laminar  
 118 BOLD response, and  $\epsilon$  is the error term. Specifically, the elements of the equation  $Y = X\beta + \epsilon$  are:

$$\begin{bmatrix} y_1 \\ y_2 \\ \vdots \\ y_{n-1} \\ y_n \end{bmatrix} = \begin{bmatrix} peak_1 & 0 & \dots & 0 \\ spread_{1,2} & peak_2 & & 0 \\ spread_{1,3} & spread_{2,3} & \ddots & 0 \\ \vdots & \vdots & & \vdots \\ spread_{1,n} & spread_{2,n} & \dots & peak_n \end{bmatrix} \begin{bmatrix} \beta_1 \\ \beta_2 \\ \vdots \\ \beta_{n-1} \\ \beta_n \end{bmatrix} + \begin{bmatrix} \epsilon_1 \\ \epsilon_2 \\ \vdots \\ \epsilon_{n-1} \\ \epsilon_n \end{bmatrix} \quad \text{Equation 1}$$

119 where  $y_i$  is the BOLD response measured at bin  $i$ ,  $peak_i$  is the peak value of the PSF measured at bin  $i$   
 120 (BOLD response directly related to the local neuronal response),  $spread_{i,k}$  is the spread of the PSF  
 121 measured at bin  $k$  that results from the activation upstream in bin  $i$ .  $\beta$  is the underlying laminar BOLD  
 122 response free of inter-laminar leakage and  $n$  is the number of bins considered in the analysis. *Bin* indexes  
 123 the sampling points across the cortex, and runs from 1, in the bin adjacent to the white matter boundary, to  
 124  $n$ , the bin at the grey matter/CSF boundary.  $\epsilon$  is the error term that accounts for a combination of  
 125 measurement noise and potential deviations of the model from the biophysical system. As the cortex is  
 126 drained by intracortical veins unidirectionally from lower cortical layers towards the cortex, signal will only  
 127 spread towards the cortical surface and the physiological PSF will be skewed in this direction. That is why,  
 128  $X$  is lower triangular matrix. If the layer specific Point Spread Function is known, i.e. the magnitude of the  
 129  $peaks_{i,j}$  and  $spreads_{i,j}$  in Equation 1, then the underlying laminar BOLD activation profile can be obtained  
 130 by solving for  $\beta$ , as  $\tilde{\beta} = X^{-1}Y$ .

### 131 **The physiological Point Spread Function**

132 It is not possible to measure the physiological Point Spread Function (PSF) *in-vivo* in humans due to the  
 133 difficulty of obtaining the response of a single layer in a region, without simultaneously generating a  
 134 response in other layers within the region due to intra-regional laminar connections. A model of cortical  
 135 vasculature was previously developed to estimate the physiological PSF (Markuerkiaga et al., 2016). In that  
 136 work, a simple model of cortical vasculature based on published histological studies focusing on the primary  
 137 visual cortex was developed. A previously-developed BOLD signal model (Uludag et al., 2009) was then  
 138 applied to obtain the positive BOLD response across the cortex. As the simulated neuronal response, the  
 139 features of the underlying vasculature and the resulting BOLD response were known, it was possible to  
 140 estimate the physiological PSF. This model-based estimation of the physiological PSF will be used in this  
 141 manuscript (in updated form) to obtain leakage-free activation profiles.

142 The physiological PSF of the laminar response in a small region of the cortex will depend on the baseline  
 143 physiological conditions and the following two factors: the presence and size of emerging veins and the  
 144 orientation of the cortex with respect to  $B_0$ . The physiological PSF estimated in Markuerkiaga et al. (2016)  
 145 applies to the situation in which the cortical profiles to be deconvolved are the result of integrating over a  
 146 convoluted patch of cortex, and thus effectively averaging over all orientations with respect to  $B_0$ . Baseline  
 147 physiological conditions will affect the magnitude of the response, but not the shape. In addition, the  
 148 estimated PSF in that work characterized the PSF for stimuli longer than 1s - when the cortex has reached  
 149 a steady state after the stimulus onset (Markuerkiaga et al., 2016)

150 Figure 4b of Markuerkiaga et al. (2016) shows that the estimated PSF is very similar between layers. It  
 151 shows a peak in the layer of activation and a rather constant tail towards the pial surface. Hence, the  
 152 response can be approximated using two parameters, the peak at the site of activation and a constant tail  
 153 from the site of activation to the pial surface. This implies that the 'spread' values in Equation 1 do not vary  
 154 between bins, and hence that these can be replaced by a single 'tail' value for each column in matrix  $X$  of  
 155 Equation 1, and furthermore that the ratio of the peak to the tail value is independent of the layer. In this  
 156 scenario, matrix  $X$  in Equation 1 will only have two parameters and can be rewritten as shown in Equation  
 157 2.

$$\begin{bmatrix} y_1 \\ y_2 \\ \vdots \\ y_{n-1} \\ y_n \end{bmatrix} = \begin{bmatrix} peak & 0 & \dots & 0 \\ tail & peak & & 0 \\ tail & tail & \ddots & 0 \\ \vdots & \vdots & & \vdots \\ tail & tail & \dots & peak \end{bmatrix} \begin{bmatrix} \beta_1 \\ \beta_2 \\ \vdots \\ \beta_{n-1} \\ \beta_n \end{bmatrix} + \begin{bmatrix} \varepsilon_1 \\ \varepsilon_2 \\ \vdots \\ \varepsilon_{n-1} \\ \varepsilon_n \end{bmatrix} \quad \text{Equation 2}$$

158 The peak and tail values might vary between subjects due to the inter-subject variability of the BOLD  
 159 response. However, given that the vascular architecture is similar between individuals, their ratio (the peak  
 160 to tail ratio,  $p2t$ ) can be expected to show less variance. There are two ways of determining the elements  
 161 of matrix  $X$  in Equation 2. One of the options, which we will refer to as normalised, is to set  $peak = y_1$  and  
 162  $tail = y_1/p2t$ , in which case the underlying profile of the BOLD response,  $\beta$ , will be relative to the response  
 163 in the lowest bin. The other option is to write the matrix as all ones on the diagonal and  $1/p2t$  in the lower  
 164 diagonal. In this second approach, the laminar BOLD profiles will not be normalised and differences in the  
 165 average magnitude of the profiles between subjects would reflect differences in the average BOLD  
 166 response between them, and variations in the profiles would represent both the underlying neuronal activity  
 167 and differences in the underlying vascular density.

168 The consequences for the laminar profiles of: using an exact PSF for each layer; normalising this exact  
 169 PSF to the response at the lowest bin; or replacing the normalised, layer-specific PSFs with a single  
 170 normalised  $p2t$  value that is constant across the cortex, are described in the *Supporting Information (part*  
 171 *1)*. The results of this analysis show that: a deconvolution with the exact PSF corrects both for leakage and  
 172 differences in vascular density; normalisation means that only leakage is corrected, and that there is little  
 173 difference between using a true PSF form, or a single  $p2t$ -value for the entire cortex (see [SI:Figure 1](#)). The

174 latter two approaches approximate the deconvolved profile from what could be obtained by a spin echo  
175 acquisition, which is sensitive to variations in vascular density.

176

### 177 *Magnitude of the p2t and its adjustment for different cortical sampling densities*

178 Following (Uludag et al., 2009), the parameters used for estimating the p2t at 7T in Markuerkiaga et al.  
179 (2016) assumed no intravascular venous contribution to the BOLD signal change at this field strength.  
180 However, there are a number of studies performed at 7T that indicate that there is an intravascular  
181 contribution to the BOLD signal at the echo times typically used in fMRI experiments (Blockley et al., 2008;  
182 Koopmans et al., 2011; Poser and Norris, 2009) and that this amounts to ~ 8% of the total BOLD response  
183 at  $TE=T2^*_{GM}$  at 7T. In order to have a more experimentally accurate p2t value, the parameters in  
184 Markuerkiaga et al. (2016) were updated so that the venous intravascular contribution at 7T would be ~8%  
185 (see *Supporting Information*, part 2). The resulting p2t value at  $TE=T2^*_{GM}$  at 7T is then 6.3, instead of the  
186 5.1 previously obtained in the absence of intravascular contribution.

187 The p2t values presented in the previous paragraph assume that the cortex has been divided into 10 bins.  
188 If a different number of bins is used, then the p2t has to be adjusted according to the following formula:

$$p2t = p2t_{model} \times \frac{n}{n_{model}} + \frac{n_{model} - n}{2n_{model}} \quad \text{Equation 3}$$

189 where  $n$  is the number of bins across the cortex in the acquired data and  $n_{model}$  is the number of bins used  
190 in the model used to estimate  $p2t_{model}$  (in this case,  $n_{model}=10$ ). See *Supporting Information part 3* for the  
191 derivation of [Equation 3](#).

### 192 *Data based estimation of the physiological PSF*

193 It is not possible to measure the physiological PSF non-invasively *in-vivo*. However, assuming that it is valid  
194 to characterise the physiological PSF using a single value of the p2t ratio, then a multi-echo dataset can be  
195 employed to perform a data-based estimation of this parameter. In this manuscript we utilise a multi-echo  
196 FLASH acquisition, which gives an activation profile for each echo time for the same underlying neural  
197 activity. The response at each echo time is described by [Equation 2](#). The parameters of the physiological  
198 PSF in matrix  $X$  will vary with TE (as described below) but the pattern followed by the underlying laminar  
199 response,  $\beta$ , will be TE-independent. Therefore, when activation profiles at different echo times are  
200 combined, the system will not be underdetermined and both the TE-dependent peak and tail magnitudes  
201 (and hence the p2t) and the TE-independent lamina BOLD responses can be estimated. The multi-echo  
202 3D-FLASH sequence used had 10 echo times ranging from  $TE= 5.7$  ms to  $TE= 56.1$  ms (see next  
203 subsection for more details on these data). In order to better compare profiles acquired at different TEs it  
204 was found necessary to also model the signal contribution from the pial leading to a slight extension of  
205 [Equation 2](#). This is particularly important for short TEs where the intravascular contribution at the pial

206 surface can be large. Two parameters, the pial response,  $pial$ , and the partial volume factor,  $\alpha$ , are  
 207 introduced to account for partial volume effects with the pial surface signal as follows:

$$\begin{bmatrix} y_1 \\ y_2 \\ \vdots \\ y_8 \\ y_9 \\ y_{10} \\ y_{11} \end{bmatrix} = \begin{bmatrix} peak & 0 & \dots & 0 \\ tail & peak & & 0 \\ tail & tail & \ddots & 0 \\ tail & tail & \dots & peak \\ tail & tail & \dots & tail \end{bmatrix} \begin{bmatrix} \beta_1 \\ \beta_2 \\ \vdots \\ \beta_8 \\ \beta_9 \\ \beta_{10} \end{bmatrix} + \begin{bmatrix} 0 \\ 0 \\ \vdots \\ 0 \\ \alpha * pial \\ \alpha * pial \\ pial \end{bmatrix} + \begin{bmatrix} \varepsilon_1 \\ \varepsilon_2 \\ \vdots \\ \varepsilon_8 \\ \varepsilon_9 \\ \varepsilon_{10} \\ \varepsilon_{11} \end{bmatrix}$$

Equation 4

$$\begin{matrix} \underline{Y}_{TEk} & = & \underline{X}_{TEk} & \underline{\beta} & + & \underline{P}_{TEk} & + & \underline{\varepsilon}_{TEk} \\ [11 \times 1] & & [11 \times 10] & [10 \times 1] & & [11 \times 1] & & [11 \times 1] \end{matrix}$$

208 where  $\alpha$  is the fraction of pial partial volume and can spread up to two bins (equivalent to one voxel) below  
 209 the cortical surface (see Figure 3 in (Koopmans et al., 2011)). The parameter  $pial$  refers to the magnitude  
 210 of the pial signal, i.e.  $y_{11}$ , which is left for the algorithm to solve. All other parameters are as defined for  
 211 Equation 2. Equation 5 shows how data for the different echo times, the elements in Equation 4, are  
 212 combined to estimate p2t based on the experimental data. As mentioned earlier, the underlying neural- and  
 213 hemodynamic responses do not vary between echo times, and the profile of the leakage free BOLD  
 214 response,  $\beta$ , across the cortex will not vary either. The magnitude of the leakage-free profile is in principle  
 215 TE-dependent, but as the peak and tail values are calculated for each echo time, any differences in the  
 216 average magnitude of  $\beta$  across echo times will lead to a scaling of the corresponding peak and tail values.

217

$$\begin{bmatrix} \underline{Y}_{TE1} \\ \underline{Y}_{TE2} \\ \vdots \\ \underline{Y}_{TE10} \end{bmatrix} = \begin{bmatrix} \underline{X}_{TE1} \\ \underline{X}_{TE2} \\ \vdots \\ \underline{X}_{TE10} \end{bmatrix} \underline{\beta} + \begin{bmatrix} \underline{P}_{TE1} \\ \underline{P}_{TE2} \\ \vdots \\ \underline{P}_{TE10} \end{bmatrix} + \begin{bmatrix} \underline{\varepsilon}_{TE1} \\ \underline{\varepsilon}_{TE2} \\ \vdots \\ \underline{\varepsilon}_{TE10} \end{bmatrix}$$

Equation 5

218

219 In Equation 5 there are 41 parameters to estimate (10 underlying leakage-free BOLD responses  $\beta$ , one per  
 220 cortical bin, one peak, one tail and one pial surface value per echo time, and one partial volume fraction)  
 221 and 110 observations (11 cortical bins, including the pial surface, for each of the 10 echo times). Least  
 222 squares non-linear data-fitting using the ‘Trust region algorithm’ as implemented in MATLAB 2017a (The  
 223 MathWorks, Inc.) was used to approximate the solution of the overdetermined system. Apart from the  
 224 description of the system to solve, this solver requires initial values of the parameters for the first iteration,  
 225 as well as upper and lower boundaries. Lower boundaries have all been set to 0 and upper boundaries to  
 226 10. Initial parameter values were set in the following way:

- 227 • Leakage-free BOLD response,  $\beta$ : values were randomly picked at each cortical bin from a uniform  
 228 distribution between 0 and 10.



- 229 • Peak values: randomly picked for each TE from a uniform distribution between 0 and 10.
- 230 • Tail values: the peak value divided by a plausible peak to tail ratio (p2t). This peak to tail ratio was
- 231 randomly chosen from a uniform distribution between 4 and 8. This range was chosen based on
- 232 the results presented in Figure 5, and because the p2t estimated in the model was 6.3.
- 233 • Pial values: randomly picked for each TE from a uniform distribution between 0 and 10.

234 As no constraints on the profiles of the  $\beta$ s were set, very large and small values of p2t could also represent  
235 numerical solutions for the system, although they are not physiologically plausible. That is why a loose  
236 relationship following physiologically plausible values was set between the initial values of the peak and tail  
237 parameters (i.e. the third item in the list above). In order to avoid that the parameter estimations were  
238 strongly biased by the initial parameter values fed to the solver. The procedure was repeated 100 times  
239 and the median of the 100 p2t values calculated using this procedure was considered to be the p2t for each  
240 TE estimated by this method.

## 241 **Description of experimental datasets**

242 The approach to obtain leakage-free BOLD laminar responses was tested in two functional datasets that  
243 were originally acquired for other purposes: an ultrahigh-resolution dataset with 0.55 mm isotropic voxel  
244 size (Fracasso et al., 2018) and a multi-echo FLASH dataset (Koopmans et al., 2011). A detailed description  
245 of the MR acquisition protocols and the extraction of the cortical activation profiles can be found in the  
246 original articles. Here, the most relevant parameters necessary to understand the nature of the profiles  
247 used for the deconvolution are given (see [Table 1](#) for a summary).

248 ([Figure 1](#))

249 ([Table 1](#))

### 250 *Ultrahigh-resolution dataset:*

251 The ultrahigh-resolution dataset was acquired at 7T using the 3D-EPI sequence and a dedicated coil array  
252 positioned under the occipital lobe (Fracasso et al., 2018). The response to a checkerboard-like stimulus  
253 covering half of the visual field was measured in ipsilateral and contralateral V1, obtaining a negative and  
254 positive BOLD response, respectively. The voxel size was 0.55 mm isotropic. The cortical boundary was  
255 manually segmented and, following the equivolume principle, 16 surfaces across the cortex were generated.  
256 The 16 points of the corresponding node (or vertex) at each of the surfaces make up the sampling points  
257 for a given profile.

258 Following Fracasso et al. (2018), data were divided into profiles presenting a weak, middle or strong linear  
259 component ([Figure 1a](#) shows the profiles of the positive BOLD response for a sample subject). The  
260 argument for this parcellation was that at this resolution, some of the profiles will not contain large emerging  
261 veins and will therefore be dominated by the laminar response.

262 The first 40% of the profiles with the weakest linear trend were averaged to obtain the weak linear trend  
263 profile. The strongest 30% linear trend were averaged to obtain the strong linear trend and the remaining  
264 30% generated an intermediate trend. As the p2t value estimated in Markuerkiaga et al. (2016) assumes  
265 that individual profiles are added along the convoluted cortex, the average BOLD response was calculated  
266 as shown in Equation 6 to test the deconvolution approach. The resulting profile is shown as a thick black  
267 line in Figure 1a.

$$\begin{aligned} \text{average BOLD} &= 0.4 \times \text{weak linear profile} + 0.3 \times \text{intermediate linear profile} + 0.3 \\ &\times \text{strong linear profile} \end{aligned} \quad \text{Equation 6}$$

268

269 *Multi-echo dataset.*

270 The 3D-FLASH multi-echo dataset was acquired at 7T using an isotropic voxel size of 0.75 mm (Koopmans  
271 et al., 2011). The stimulus used was a flickering checkerboard covering the central portion of the visual field.  
272 Cortical profiles were obtained by heavily sampling between corresponding vertices on the mesh generated  
273 on the WM/GM surface and on the GM/pial surface. For each pair of vertices, 100 equally spaced points  
274 were acquired within GM, and 100 equally spaced points at either side of the cortex, i.e. in the WM and pial  
275 surface. Sampling the cortex at both sides allowed for the careful realignment of cortical profiles over the  
276 activated primary visual cortex (V1) based on two landmarks, the GM/CSF boundary and the stripe of  
277 Gennari, giving profiles such as shown in Figure 1b. The magnitude and shape of the cortical BOLD profile  
278 is TE-dependent, whereas the underlying activation is the same across TEs. In the current manuscript the  
279 multi-echo data were down-sampled to 10 cortical bins within grey matter, corresponding to the cortical  
280 sampling in the cortical model.

## 281 **Assessment of the leakage-free profiles**

282 The profiles classified as showing a weak linear profile in the ultrahigh resolution dataset have little  
283 contribution from intracortical veins. They can be considered a good approximation of leakage-free profiles,  
284 and as such, these are the profiles against which the performance of the deconvolution approach is  
285 assessed in this manuscript. For this purpose, a similarity metric between the obtained profile and the  
286 leakage free ground truth is determined using the normalised dot product (Deshpande et al., 2013), defined  
287 in Equation 7:

$$\begin{aligned} \widehat{prof}_k &= \frac{prof_k}{|prof_{xk}|} \\ \widehat{prof}_x &= \frac{prof_x}{|prof_x|} \\ \text{similarity metric} &= \widehat{prof}_{deconv} \cdot \widehat{prof}_{GT} \end{aligned} \quad \text{Equation 7}$$

288 If the similarity metric is 1, the two profiles are identical or scaled versions of one another. If 0, they are  
289 orthogonal to each other.

290 In the present article we consider the weak linear trend profiles to represent a gold standard for the  
291 deconvolution. They are similar to spin-echo profiles, but are acquired with a normal gradient-echo  
292 technique. The weak profiles were acquired with a very high spatial resolution of 0.5 mm isotropic which  
293 may not always be attainable, or indeed desirable if the goal is to acquire data from extended regions of  
294 cortex within an acceptable acquisition time. We first consider the deconvolution of the average profiles  
295 obtained in the high resolution experiment and compare the result to the weak linear profile. We then  
296 deconvolve the profiles of the multi-echo data set and examine their similarity as a function of TE with the  
297 weak profiles. We then explore the sensitivity of the results obtained to the exact value of the p2t value  
298 chosen both for the ultrahigh resolution data set, and for the multi-echo data set. Finally, we use the multi-  
299 echo data set to determine the optimum p2t value for each subject, and averaged over subjects.

300

## 301 **RESULTS**

### 302 *Deconvolution with the p2t on GE-BOLD activation profiles*

303 The deconvolution results for the ultrahigh resolution dataset are shown in [Figure 2](#). [Figure 2a](#) shows the  
304 weighted average cortical profile for each subject (one acquired twice), obtained using [Equation 6](#), the  
305 average across all subjects is shown in black. [Figure 2b](#) shows the corresponding deconvolved profiles.  
306 The ultrahigh resolution dataset was sampled with 16 bins across the cortex, therefore, before performing  
307 the deconvolution, the p2t value from the cortical model was adjusted for the number of bins following  
308 [Equation 3](#). These deconvolved profiles no longer show an ascending pattern towards the pial surface, and  
309 show a significantly higher similarity ( $p=0.00$ ) with the corresponding, subject-specific, weak linear trend  
310 profiles than with the corresponding average cortical profiles.

311 ([Figure 2](#))

312 The multi-echo dataset contains one activation profile per echo-time. Before applying the deconvolution for  
313 each of the echo times following [Equation 2](#), the echo time specific p2t values were calculated using the  
314 vascular model described in (Markuerkiaga et al., 2016). The magnitude of the estimated p2t values at 7T  
315 for TEs between 4.8 and 56.1 ms are between 6 and 7.1 (see [SI:Figure 2](#)). [Figure 3](#) shows the deconvolved  
316 profiles for each of the echo times averaged over subjects. Similar to the ultrahigh resolution dataset, the  
317 profiles no longer increase steadily from the WM/GM boundary to the GM/CSF boundary. Indeed, as shown  
318 in [Figure 4](#), the deconvolved profiles show a significantly stronger similarity with the average of the weak  
319 linear profile in the ultrahigh-resolution dataset.

320 ([Figure 3](#))

321 ([Figure 4](#))

### 322 *Magnitude of the p2t*

323 The profiles corrected for the inter-laminar leakage presented so far rely on the updated vascular model  
324 described in Markuerkiaga et al. (2016) shown in [SI:Figure 2](#). Nonetheless, the experimental, subject  
325 specific p2t value may vary from the model-based estimation due to differences in baseline or hemodynamic  
326 conditions.

327 [Figure 5](#) shows the similarity between the weak linear profile and the ultrahigh resolution dataset  
328 deconvolved with p2t values that range from 1 to 20. The similarity metric has its maximum between p2t=  
329 5-8 and steadily decreases with increasing magnitude of the p2t (note that the similarity metric is not a  
330 very sensitive measure, so large changes in profile result in small changes in the metric.).

331 ([Figure 5](#))

332 [Figure 6](#) shows the effect of the magnitude of the p2t used on the deconvolved profiles by showing profiles  
333 for a range of p2t values between 1 and 20. In line with the estimation of the vascular model and the results  
334 shown in [Figure 5](#), the curves obtained using a p2t value between 5 and 8 show flatter profiles than the rest  
335 of the p2ts and therefore stronger similarity metrics as shown in figures 5 and 6b.

336 ([Figure 6](#))

337 In the multi-echo dataset, measured activation profiles and p2t values are expected to be TE-dependent,  
338 but the underlying neuronal activity is not. This feature is exploited to obtain a data-based estimation of the  
339 p2t by combining the data for all echo times and solving the system in [Equation 5](#) following a minimisation  
340 approach. [Figure 7](#) shows the results of the p2t estimation for TE=27.6 ms, close to the T2\* of grey matter  
341 at 7 T. Most of the p2t values obtained fall between 5 and 9. The results for Subject 1 represent an outlier  
342 that can be explained by the unusual shape of the profiles for this subject at longer TEs. When these longer  
343 echo times, with a poorer SNR, were not considered, then Subject 1 was no longer an outlier and the  
344 distribution of the estimated p2ts was concentrated more strongly in the range 5-9 ([SI:Figure 5](#)).

345 ([Figure 7](#))

## 346 **DISCUSSION**

347 The deconvolution of GE-BOLD profiles with the physiological point spread function results in flatter cortical  
348 profiles that do not present a clear ascending pattern, in line with profiles obtained using BOLD based  
349 techniques that are less sensitive to the contribution of veins larger than 20  $\mu\text{m}$  in diameter, such as SE  
350 and GRASE (Jin and Kim, 2008; Kemper et al., 2015; Zhao et al., 2006). This flat profile is expected, as in  
351 both datasets the cognitive task that subjects needed to perform was to attend to a visual stimulus that  
352 consisted of a full- or semi-field flickering checkerboard. This stimulus is not expected to generate much  
353 feedback from higher order areas in the primary visual cortex (Xing et al., 2012). The deconvolution of GE-  
354 BOLD profiles with the PSF is a valid approach to eliminate the inter-laminar signal leakage through  
355 intracortical veins, while still benefiting from the higher efficiency and sensitivity achievable with GE  
356 sequences.

### 357 *Deconvolved profiles*

358 The deconvolved profiles of the positive BOLD response show a strong resemblance to the weak linear  
359 trend profiles (see [Figure 2](#) and SI:Figure 3). The deconvolved profiles show a significantly higher similarity  
360 degree ( $p=0.00$ ) with the weak linear trend profiles than with the average measured activation profiles in  
361 that dataset. The deconvolved profiles in the multi-echo dataset also show a significantly stronger similarity  
362 with the average weak linear profiles in the high-resolution dataset, than with their corresponding measured  
363 raw profiles ( $p=0.027$ ).

364 The deconvolved profiles in the multi-echo dataset tend to show a slight increase just above the middle of  
365 the cortex, where microvascular density shows its maximum (Duvernoy et al., 1981) and the afferent  
366 connections from the thalamus end (Rockland, 2017). This small increase is less obvious in the profiles  
367 obtained for the positive BOLD response in the high-resolution dataset from Fracasso et al. (2018), although  
368 the underlying response is expected to be similar between them. A plausible reason for this may be that in  
369 the multi-echo dataset the individual profiles were realigned using the stripe of Gennari and the GM/CSF  
370 boundary as landmarks. Slight misalignments are likely to blur the small bump and lead to a flatter profile.

### 371 *Validation of the estimated PSF and its approximation as a peak to tail ratio*

372 Estimating the physiological point spread function is not possible/feasible in practical terms. Therefore, the  
373 deconvolution approach presented in this manuscript makes use of a model-based estimation. Using a  
374 physiological PSF obtained from an average model of cortical vasculature is expected to be a valid  
375 approximation of the subject-specific physiological PSF, as the microvascular architecture across the  
376 primary visual cortex shows little inter-subject variability (Weber et al., 2008). Similarly, the microvascular  
377 profiles between V1 and the rest of the regions in the visual cortex do not diverge considerably, although  
378 V1 shows a more pronounced peak in layer IV. The differences in micro-vascular density between regions  
379 will be accompanied by differences in the intracortical veins that drain them. The form of the PSF is not

380 expected to vary and the fact that the parameter that describes the PSF is used as a ratio in this approach  
381 will minimise differences related to differences in the vascular density between regions.

382 The results in this manuscript show that a peak to tail ratio  $\sim 6.3$  for TE= 27.6 ms at 7T for 10 sampling  
383 points across the primary visual cortex adequately describes the biophysical properties of the leakage effect.  
384 If the same approach is applied to other regions then the p2t value will need to be adjusted to accommodate  
385 different cortical thicknesses using [Equation 3](#). Various studies in laminar fMRI literature (Kok et al., 2016;  
386 Lawrence et al., 2019; Lawrence et al., 2018; Sharoh et al., 2019) divide the cortex in three layers, in that  
387 case, the equivalent peak to tail ratio to the one observed here would be 2.24.

### 388 *Combination with the spatial GLM*

389 As mentioned in the Introduction, a BOLD profile that has been extracted using the spatial GLM still suffers  
390 from the inter-laminar leakage problem. The output of the GLM unmixing as implemented in van Mourik et  
391 al. (2019) is a signal time-course for each of the laminae. A 'lamina' in this context is each of the cortical  
392 bins that the cortex has been divided into for the analysis and does not have to correspond to a histological  
393 layer. The condition specific cortical activation profile obtained using this approach could further be  
394 deconvolved with the physiological PSF.

### 395 *General requirements to apply the deconvolution approach*

396 Most importantly good segmentation and co-registration are paramount to applying the approach. If the  
397 cortical sampling deviates too much from the model due to segmentation problems, the approach will fail.

398 Once the cortical boundaries have been defined it is also important that the bins obtained are the same  
399 size. The model used to estimate the p2t, (Markuerkiaga et al., 2016) implicitly relies on the equivolume  
400 sampling approach (Waehnert et al., 2014). Hence, this method should be favoured over the equidistant  
401 approach, although the differences between the two have been found to be negligible for voxels with a side >  
402 0.6 mm in the direction perpendicular to the cortical surface (Kemper et al., 2017).

403 As previously mentioned [Equation 2](#) assumes that the response of the cortical vasculature to the stimulus  
404 is in a steady state and does not apply to transient cases, this will be the case for stimuli longer than 1s.  
405 Furthermore as assumed in Markuerkiaga et al. (2016) profiles should have been obtained integrating over  
406 a sufficiently large and convoluted patch of cortex that there is no preferred orientation of the venous  
407 vasculature.

408

### 409 *Non-BOLD sources of signal spread through layers*

410 The Lorentzian broadening induced by the relaxation during acquisition is  $\Delta f = 1/\pi T_2^*$  (Marques and Norris,  
411 2018). At 7T this equates to 11.4 Hz for grey matter ( $T_2^* \sim 28$ ms) and 45.6Hz for venous blood ( $T_2^* \sim 7$ ms).

412 The multi-echo dataset was acquired using the 3D-FLASH sequence. Therefore, the BW per pixel in the  
413 PE direction is infinite whereas the BW/pixel in the RO direction is 240Hz/pixel. These values are above  
414 the line broadening induced by the acquisition train and hence the results presented here will not be affected.

415 The high-resolution dataset was acquired using 3D-EPI and the BW/pixel in the phase encoding directions  
416 was 21Hz/pixel (Fracasso et al., 2018). This is smaller than the line broadening expected for venous blood.  
417 However, the TE= 27ms was matched to T2\*GM. At this echo time, the intravascular contribution to the  
418 BOLD signal is more than 10 times smaller than the extravascular contribution (Cheng et al., 2015). Hence,  
419 it can be assumed that the smearing of the profiles due to Lorentzian line-broadening is negligible.  
420 Regardless of whether deconvolution is used or not, studies focusing on laminar activation or that require  
421 high spatial accuracy should control that the Lorentzian broadening is confined to a voxel when setting the  
422 acquisition parameters.

423

## 424 **CONCLUSIONS**

425 The deconvolution approach has been applied to GE-BOLD profiles obtained at 7T acquired using similar  
426 stimuli but different sequences, resolutions and processed with different number of samples across the  
427 cortex. The deconvolved profiles no longer show an ascending shape, in-line with the profiles obtained  
428 without a strong contribution from large vessels. The deconvolution approach offers a means to obtain inter-  
429 laminar leakage-free profiles, while still benefitting from the higher efficiency and sensitivity of GE-BOLD  
430 based functional acquisition methods.

431

432

## 433 **ACKNOWLEDGEMENTS**

434 This work was supported by the Initial Training Network, HiMR, funded by the FP7 Marie Curie Actions of  
435 the European Commission (FP7-PEOPLE-2012-ITN-316716). The authors would like to thank Peter  
436 Koopmans, Alessio FracassoF, Natalia Petriodu and their collaborators for providing high resolution GE-  
437 BOLD cortical profiles and Eli Alberdi for critical feedback on the minimization approach. Part of this work  
438 has been presented in the 24th ISMRM Annual Meeting in Singapore.



439 **BIBLIOGRAPHY**

- 440 Barth M, Meyer H, Kannengiesser SAR, Polimeni JR, Wald LL, Norris DG. T-2-Weighted 3D fMRI Using S-  
441 2-SSFP at 7 Tesla. *Magn. Reson. Med.*, 2010; 63: 1015-20.
- 442 Blockley NP, Jiang L, Gardener AG, Ludman CN, Francis ST, Gowland Pa. Field strength dependence of R1  
443 and R2\* relaxivities of human whole blood to ProHance, Vasovist, and deoxyhemoglobin. *Magnetic  
444 resonance in medicine : official journal of the Society of Magnetic Resonance in Medicine / Society of  
445 Magnetic Resonance in Medicine*, 2008; 60: 1313-20.
- 446 Bonaiuto JJ, Rossiter HE, Meyer SS, Adams N, Little S, Callaghan MF, Dick F, Bestmann S, Barnes GR. Non-  
447 invasive laminar inference with MEG: Comparison of methods and source inversion algorithms.  
448 *Neuroimage*, 2018; 167: 372-83.
- 449 Boxerman JL, Hamberg LM, Rosen BR, Weisskoff RM. MR contrast due to intravascular magnetic  
450 susceptibility perturbations. *Magn Reson Med*, 1995; 34: 555-66.
- 451 Cheng K, Waggoner Ra, Tanaka K. Human ocular dominance columns as revealed by high-field functional  
452 magnetic resonance imaging. *Neuron*, 2001; 32: 359-74.
- 453 Cheng Y, van Zijl PCM, Hua J. Measurement of parenchymal extravascular R2\* and tissue oxygen  
454 extraction fraction using multi-echo vascular space occupancy MRI at 7 T. *NMR in Biomedicine*, 2015; 28:  
455 264-71.
- 456 Deshpande R, Vandersluis B, Myers CL. Comparison of Profile Similarity Measures for Genetic Interaction  
457 Networks. 2013; 8.
- 458 Duvernoy HM, Delon S, Vannson JL. Cortical blood vessels of the human brain. *Brain research bulletin*,  
459 1981; 7: 519-79.
- 460 Ehses P, Budde J, Shajan G, Scheffler K. T2-weighted BOLD fMRI at 9.4 T using a S2-SSFP-EPI sequence.  
461 *Proc Int Soc Mag Reson Med, Salt Lake City*, 2013; 21: 414.
- 462 Felleman DJ, Van Essen DC. Distributed hierarchical processing in the primate cerebral cortex. *Cereb  
463 Cortex*, 1991; 1: 1-47.
- 464 Finn ES, Huber L, Jangraw DC, Molfese PJ, Bandettini PA. Layer-dependent activity in human prefrontal  
465 cortex during working memory. *Nature Neuroscience*, 2019; 22: 1687-+.
- 466 Fracasso A, Luijten PR, Dumoulin SO, Petridou N. Laminar imaging of positive and negative BOLD in  
467 human visual cortex at 7T. *Neuroimage*, 2018; 164: 100-11.
- 468 Goa PE, Koopmans PJ, Poser BA, Barth M, Norris DG. BOLD fMRI signal characteristics of S1- and S2-SSFP  
469 at 7 Tesla. *Frontiers in neuroscience*, 2014; 8: 49.

- 470 Goense JBM, Logothetis NK. Laminar specificity in monkey V1 using high-resolution SE-fMRI. *Magnetic*  
471 *Resonance Imaging*, 2006; 24: 381-92.
- 472 Guidi M, Huber L, Lampe L, Gauthier CJ, Moller HE. Lamina-dependent calibrated BOLD response in  
473 human primary motor cortex. *Neuroimage*, 2016; 141: 250-61.
- 474 Harel N, Uğurbil K, Uludağ K, Yacoub E. Frontiers of brain mapping using MRI. *Journal of Magnetic*  
475 *Resonance Imaging*, 2006; 23: 945-57.
- 476 Harmer J, Sanchez-Panchuelo RM, Bowtell R, Francis ST. Spatial location and strength of BOLD activation  
477 in high-spatial-resolution fMRI of the motor cortex: A comparison of spin echo and gradient echo fMRI  
478 at 7T. *NMR in Biomedicine*, 2012; 25: 717-25.
- 479 Havlicek M, Uludag K. A dynamical model of the laminar BOLD response. *Neuroimage*, 2020; 204.
- 480 Huber L, Goense J, Kennerley AJ, Trampel R, Guidi M, Reimer E, Ivanov D, Neef N, Gauthier CJ, Turner R,  
481 Moller HE. Cortical lamina-dependent blood volume changes in human brain at 7 T. *Neuroimage*, 2015;  
482 107: 23-33.
- 483 Huber L, Handwerker DA, Jangraw DC, Chen G, Hall A, Stuber C, Gonzalez-Castillo J, Ivanov D, Marrett S,  
484 Guidi M, Goense J, Poser BA, Bandettini PA. High-Resolution CBV-fMRI Allows Mapping of Laminar  
485 Activity and Connectivity of Cortical Input and Output in Human M1. *Neuron*, 2017; 96: 1253-63.e7.
- 486 Jin T, Kim SG. Improved cortical-layer specificity of vascular space occupancy fMRI with slab inversion  
487 relative to spin-echo BOLD at 9.4 T. *Neuroimage*, 2008; 40: 59-67.
- 488 Kashyap S, Ivanov D, Havlicek M, Poser BA, Uludag K. Impact of acquisition and analysis strategies on  
489 cortical depth-dependent fMRI. *Neuroimage*, 2018; 168: 332-44.
- 490 Kemper VG, De Martino F, Emmerling TC, Yacoub E, Goebel R. High resolution data analysis strategies  
491 for mesoscale human functional MRI at 7 and 9.4T. *Neuroimage*, 2017.
- 492 Kemper VG, De Martino F, Vu AT, Poser BA, Feinberg DA, Goebel R, Yacoub E. Sub-millimeter T2  
493 weighted fMRI at 7 T: comparison of 3D-GRASE and 2D SE-EPI. *Frontiers in neuroscience*, 2015; 9: 163.
- 494 Kok P, Bains LJ, van Mourik T, Norris DG, de Lange FP. Selective Activation of the Deep Layers of the  
495 Human Primary Visual Cortex by Top-Down Feedback. *Current biology : CB*, 2016; 26: 371-6.
- 496 Koopmans PJ, Barth M, Orzada S, Norris DG. Multi-echo fMRI of the cortical laminae in humans at 7 T.  
497 *Neuroimage*, 2011; 56: 1276-85.
- 498 Koopmans PJ, Yacoub E. Strategies and prospects for cortical depth dependent T2 and T2\*-weighted  
499 BOLD fMRI studies. *Neuroimage*, 2019; 197: 668-76.

- 500 Krieger SN, Streicher MN, Trampel R, Turner R. Cerebral blood volume changes during brain activation.  
501 *Journal of Cerebral Blood Flow and Metabolism*, 2012; 32: 1618-31.
- 502 Lawrence SJD, Norris DG, de Lange FP. Dissociable laminar profiles of concurrent bottom-up and top-  
503 down modulation in the human visual cortex. *Elife*, 2019; 8.
- 504 Lawrence SJD, van Mourik T, Kok P, Koopmans PJ, Norris DG, de Lange FP. Laminar Organization of  
505 Working Memory Signals in Human Visual Cortex. *Current Biology*, 2018; 28: 3435-+.
- 506 Lu H, Golay X, Pekar JJ, van Zijl PCM. Functional magnetic resonance Imaging based on changes in  
507 vascular space occupancy. *Magn. Reson. Med.*, 2003; 50: 263-74.
- 508 Markuerkiaga I, Barth M, Norris DG. A cortical vascular model for examining the specificity of the  
509 laminar BOLD signal. *Neuroimage*, 2016; 132: 491-8.
- 510 Markuerkiaga I, Norris DG. Deconvolving the laminar gradient echo activation profiles with the spatial  
511 PSF: an approach to revealing underlying activation patterns. *Proceedings 24th Scientific Meeting,*  
512 *International Society for Magnetic Resonance in Medicine*, 2016: 0637.
- 513 Marquardt I, Schneider M, Gulban OF, Ivanov D, Uludağ K. Cortical depth profiles of luminance contrast  
514 responses in human V1 and V2 using 7 T fMRI. *Human Brain Mapping*, 2018: 1-16.
- 515 Marques JP, Norris DG. How to choose the right MR sequence for your research question at 7 T and  
516 above? *Neuroimage*, 2018; 168: 119-40.
- 517 Menon RS, Ogawa S, Strupp JP, Ugurbil K. Ocular dominance in human V1 demonstrated by functional  
518 magnetic resonance imaging. *J Neurophysiol*, 1997; 77: 2780-7.
- 519 Norris DG, Polimeni JR. Laminar (f)MRI: A short history and future prospects. *Neuroimage*, 2019; 197:  
520 643-9.
- 521 Polimeni JR, Fischl B, Greve DN, Wald LL. Laminar analysis of 7 T BOLD using an imposed spatial  
522 activation pattern in human V1. *Neuroimage*, 2010a; 52: 1334-46.
- 523 Polimeni JR, Greve DN, Fischl B, Wald LL. Depth-resolved laminar analysis of resting-state fluctuation  
524 amplitude in high-resolution 7T fMRI. *Proceedings: 18th Annual Meeting International Society for*  
525 *Magnetic Resonance in Medicine: Stockholm*, 2010b: 1168.
- 526 Poser BA, Norris DG. Investigating the benefits of multi-echo EPI for fMRI at 7 T. *Neuroimage*, 2009; 45:  
527 1162-72.
- 528 Rockland KS. What do we know about laminar connectivity? *Neuroimage*, 2017.

- 529 Sanchez Panchuelo RM, Schluppeck D, Harmer J, Bowtell R, Francis S. Assessing the spatial precision of  
530 SE and GE-BOLD contrast at 7 Tesla. *Brain Topogr*, 2015; 28: 62-5.
- 531 Sharoh D, van Mourik T, Bains LJ, Segaert K, Weber K, Hagoort P, Norris DG. Laminar specific fMRI  
532 reveals directed interactions in distributed networks during language processing. *Proceedings of the*  
533 *National Academy of Sciences of the United States of America*, 2019; 116: 21185-90.
- 534 Troebinger L, López JD, Lutti A, Bestmann S, Barnes G. Discrimination of cortical laminae using MEG.  
535 *Neuroimage*, 2014; 102: 885-93.
- 536 Uludag K, Muller-Bierl B, Ugurbil K. An integrative model for neuronal activity-induced signal changes for  
537 gradient and spin echo functional imaging. *Neuroimage*, 2009; 48: 150-65.
- 538 van Mourik T, van der Eerden J, Bazin PL, Norris DG. Laminar signal extraction over extended cortical  
539 areas by means of a spatial GLM. *Plos One*, 2019; 14.
- 540 Waehnert MD, Dinse J, Weiss M, Streicher MN, Waehnert P, Geyer S, Turner R, Bazin PL. Anatomically  
541 motivated modeling of cortical laminae. *Neuroimage*, 2014; 93 Pt 2: 210-20.
- 542 Weber B, Keller AL, Reichold J, Logothetis NK. The microvascular system of the striate and extrastriate  
543 visual cortex of the macaque. *Cereb Cortex*, 2008; 18: 2318-30.
- 544 Xing D, Yeh C-I, Burns S, Shapley RM. Laminar analysis of visually evoked activity in the primary visual  
545 cortex. *Proceedings of the National Academy of Sciences of the United States of America*, 2012; 109:  
546 13871-6.
- 547 Yacoub E, Shmuel A, Logothetis N, Ugurbil K. Robust detection of ocular dominance columns in humans  
548 using Hahn Spin Echo BOLD functional MRI at 7 Tesla. *Neuroimage*, 2007; 37: 1161-77.
- 549 Yacoub E, Ugurbil K, Olman C. Feasibility of detecting differential layer specific activations in humans  
550 using SE BOLD fMRI at 7 T. *Proceedings 17th Scientific Meeting, International Society for Magnetic*  
551 *Resonance in Medicine*, 2009; Honolulu: 1607.
- 552 Zhao F, Wang P, Hendrich K, Ugurbil K, Kim SG. Cortical layer-dependent BOLD and CBV responses  
553 measured by spin-echo and gradient-echo fMRI: insights into hemodynamic regulation. *Neuroimage*,  
554 2006; 30: 1149-60.
- 555
- 556

557 **FIGURES**

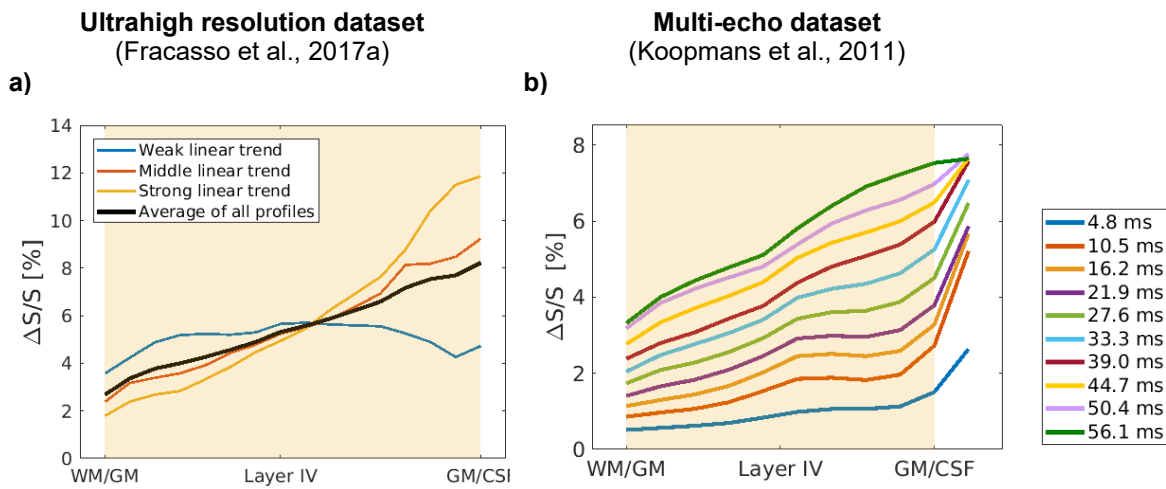

**Figure 1:** GE-BOLD cortical profiles used to test the deconvolution approach in this manuscript. The profiles shown are from an exemplary subject in each dataset. The data-points within the beige-shaded region were used for the deconvolution. The average of all profiles in the ultrahigh resolution dataset, a), was obtained using [Equation 6](#).

558

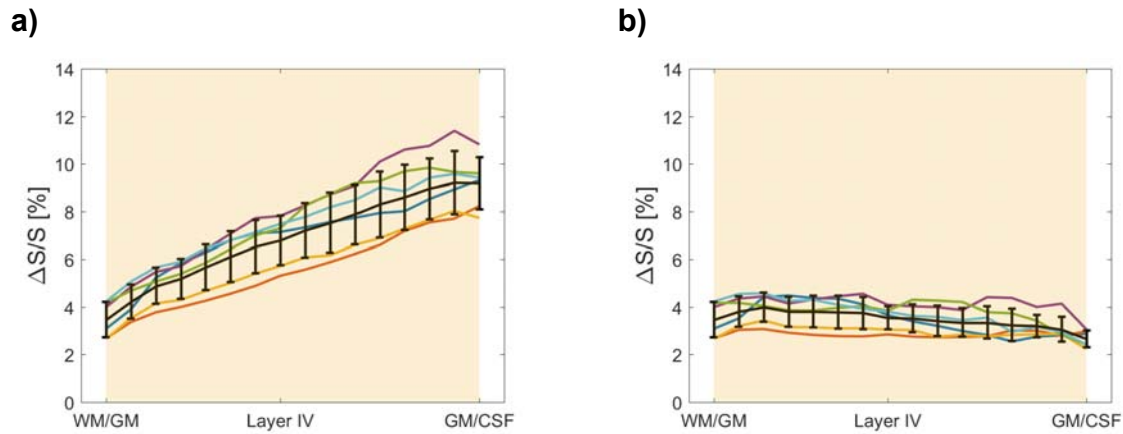

**Figure 2:** **a)** Weighted average profile of the weak, middle and strong linear profiles of the positive BOLD response in (Fracasso et al., 2017a). **b)** The corresponding deconvolved profiles. The different colours refer to different acquisitions, 5 subjects with one subject acquired twice. The black line shows the average  $\pm$  std across subjects.

559

560

561

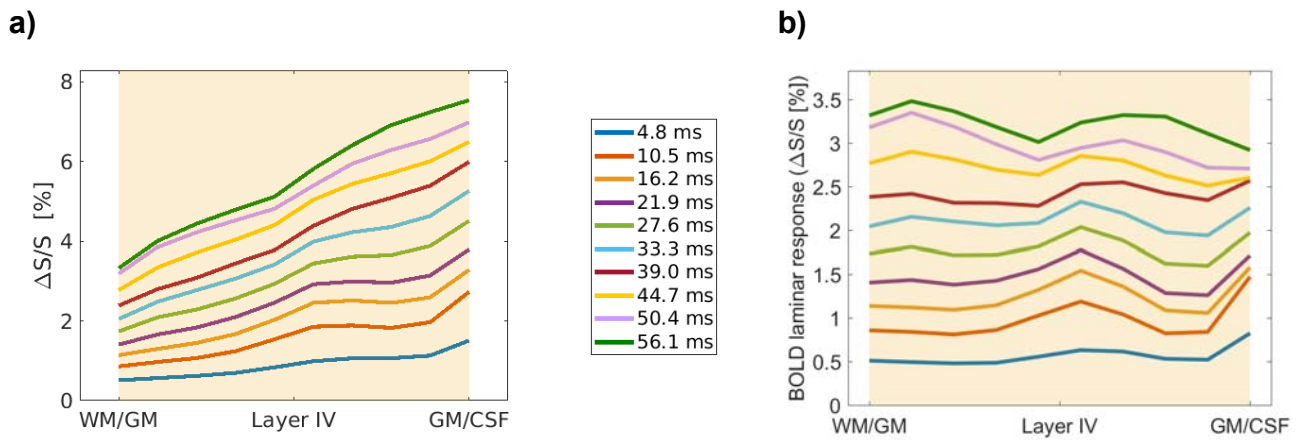

**Figure 3: a)** Measured cortical activation profiles averaged over subjects in the multi-echo dataset (Koopmans et al., 2011) as a function of TE. **b)** Deconvolved profiles, averaged over subjects, that result from deconvolving the activation profiles in a) with the corresponding, echo-time specific,  $p2t$  estimated using the vascular model.

562

563

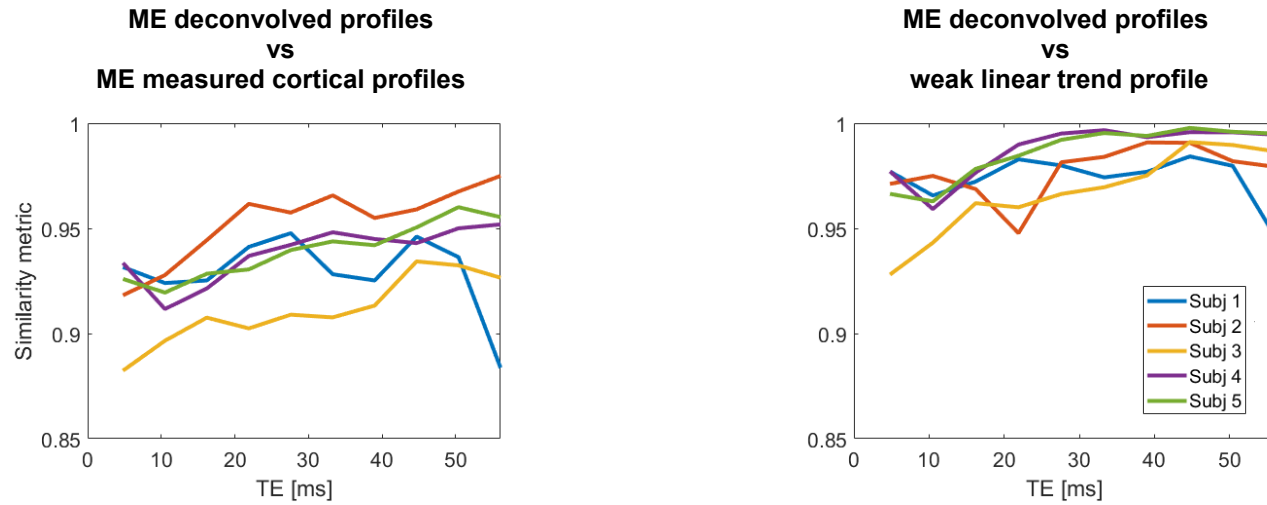

**Figure 4:** **Left:** similarity metric for the deconvolved profiles in the multi-echo dataset compared with their own (non-deconvolved) measured cortical profile. **Right:** similarity metric for the deconvolved profiles in the multi-echo dataset and the weak linear trend profile in the high-resolution dataset (blue line in Figure 2a). The colour legend is the same in both graphs. The similarity metrics are significantly different from each other between the graphs ( $p=0.027$ ,  $\alpha=0.05$ ).

564

565



566

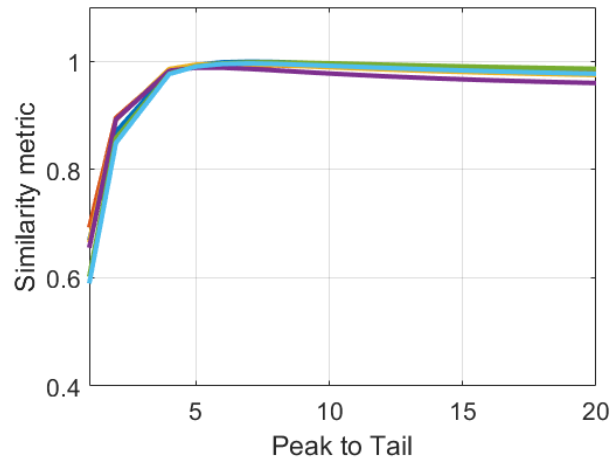

**Figure 5:** Similarity between the average cortical profile in the ultrahigh resolution dataset (shown in colour in Figure 2a) deconvolved with p2t values ranging from 1 to 20, and the corresponding weak linear profile from the same acquisition. The similarity index reaches its maximum value at about 5 for each subject, and then declines gently as the p2t increases further.

567

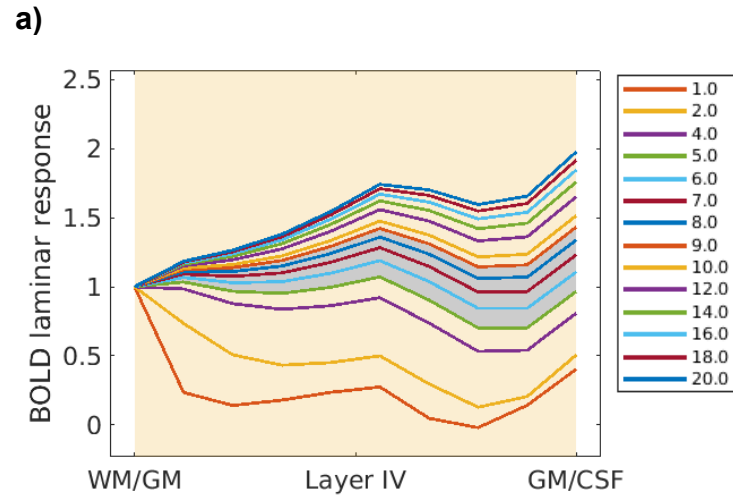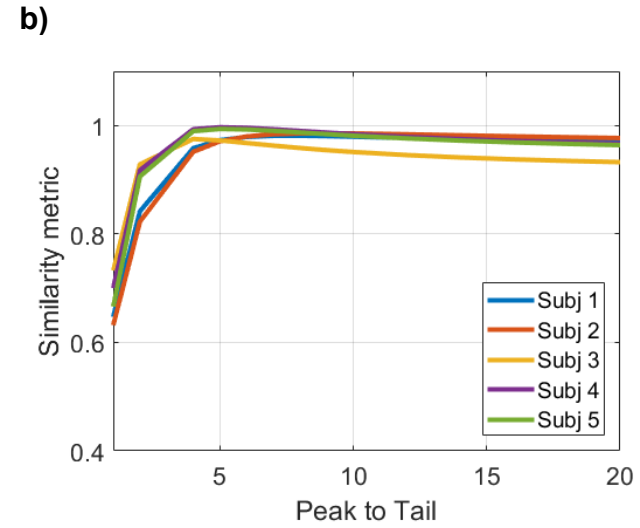

**Figure 6:** a) Results of deconvolving the profile at  $TE=T2^*_{GM}$  averaged over all subjects in the multi-echo dataset using a range of p2t values (given in the inset). The grey-shaded region covers profiles obtained for p2t between 5 and 9, the range at which Figure 5 and Figure 6b) show a maximum. b) Similarity metric between the deconvolved multi-echo profiles at  $TE=T2^*_{GM}$  with the average weak linear profile in the ultrahigh resolution dataset.

568

Supporting Information

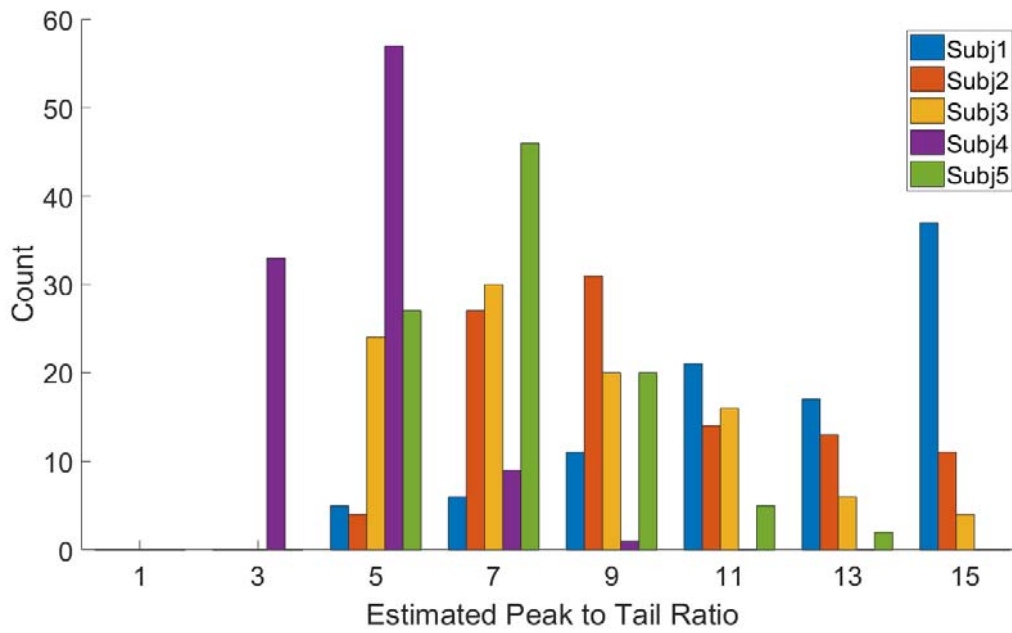

**Figure 7:** Combined histogram of the peak to tail ratio estimates at TE=27.6 ms for 100 repetitions, using data from all subjects, and estimated by applying Equation 4 to the data from the 10 echoes available. The average over subjects of the median of the p2t of the repetitions at this echo time was  $7.1 \pm 2.9$

569

570

571 **TABLE**

572

| <b>Parameters</b> | <b>Multi-echo dataset<br/>(Koopmans et al., 2011)</b> | <b>Ultrahigh resolution dataset<br/>(Fracasso et al., 2017a)</b> |
|-------------------|-------------------------------------------------------|------------------------------------------------------------------|
| Voxel size        | 0.75 mm isotropic                                     | 0.55 mm isotropic                                                |
| No. bins:         | Downsampled to 10 within GM                           | 16 within GM                                                     |
| Sequence          | 3D-FLASH, multiecho                                   | 3D-EPI                                                           |
| Vol TR/TR/TE      | 90 s/66 ms/5.7-56 ms                                  | 6.5 s/54 ms/27 ms                                                |
| Echo train length | -                                                     | 53 ms                                                            |
| Flip angle        | 15°                                                   | 20°                                                              |
| Visual stimulus:  | Flickering checkerboard                               | Semi-field flickering checkerboard                               |
| No. subjects      | 5                                                     | 5 (one of which was scanned twice)                               |

**Table 1:** Relevant acquisition parameters of the experimental datasets used in this manuscript to test the deconvolution

573
